# Supplementary material for: Engaging citizens in the development of a health system performance assessment framework: a case study in Ireland
Source: Health Res Policy Syst. 2021 Dec 20;19:148. doi: 10.1186/s12961-021-00798-8 (PMC8685819; doi:10.1186/s12961-021-00798-8)
Supplement: Supplementary file 8 — Additional file 8: Citizen panel’s suggestions of performance measures and performance-related topics. [file 12961_2021_798_MOESM8_ESM.xlsx]

## Sheet: Sticky notes
Performance measures and performance-related topics as written by citizen panel participants	Priority	Domain
Financial protection	Green	Social and financial risk protection
Numer of cases of superbugs in hospitals	Green	Safety
Appropriateness of medicine given	Green	Safety
Smiles and some humour should be an essential element in all interactions	Green	Responsiveness
Measure outcomes of care at each stage of illness	Green	Quality of care
Life expectancy	Green	Health and well-being
More information on healthy eating and lifestyles for our children	Green	Health and well-being
Preventive care should be more available. More early support information	Green	Health and well-being
Free GP care	Green	Health and well-being
Mental health	Green	Health and well-being
Rural health care plan	Green	Equity
Number of readmission or repeat cases (is it possible for first time fix?)	Green	Effectiveness
Hearing of more people prepared to drive to Northen Ireland or to Europe for cheaper care (usually elective procedures)	Green	Coverage
More home care	Green	Coverage
Know what support is available [as] expectation can sometimes be too high	Green	Accessibility
Centres of excellence	Green	Accessibility
Know the times of access to treatment in public and private	Green	Accessibility
It's very concerning that people can't access care because of cost	Red	Social and financial risk protection
Too many people are getting worse with conditions because of cost	Red	Social and financial risk protection
People with GP/medical cards can not afford to visit their GPs so they miss out on services + medicationsHow many people in retirement are not able to access health services due to high costs?	Red	Social and financial risk protection
Standardize GPs fees	Red	Social and financial risk protection
Cost of GP (for those who don't quality for medical card)	Red	Social and financial risk protection
Equity that people's health suffer because they are afraid they can't afford it	Red	Social and financial risk protection
Everyone should have access to doctor regardless of finances	Red	Social and financial risk protection
Number of people not getting appropriate care because of cost of care	Red	Social and financial risk protection
price of medication which is preventing people to visit GP	Red	Social and financial risk protection
Taxes and payment again at service delivery	Red	Social and financial risk protection
I know of cancer patients having no medical card or private health cover worring about cost on top of worring about their health	Red	Social and financial risk protection
Discharge time from the hospital after the procedure in Ireland	Red	Safety
I worry about after care and the wait for readmitting if the operation went wrong	Red	Safety
Too many readmission to hospitals	Red	Safety
I worry about being released too early	Red	Safety
How effective is the provided cure (e.g. how often do people come out of the hospital only to have to go back later?)	Red	Safety
Number of people coming back for the same disease	Red	Safety
Information on safety in hospital (what tablets are and why are they being given and if it is necessary for treatment)	Red	Safety
Want to use public health more but when you go to private it's so much better	Red	Responsiveness
Number of doctors/nurses breaking down from the stress of the profession	Red	Responsiveness
It's so important to know what is best form me towards medication and how it's explained	Red	Responsiveness
Fast access to counselling (a waiting time list is not acceptable)	Red	Responsiveness
You need to harrass people to get what you need	Red	Responsiveness
Better involvement of patients in decisions	Red	Responsiveness
My GP does allow me to have input into my treatment and medications I'm on	Red	Responsiveness
Small town GP people have no choice, no where to go, so they treat patients not right as required	Red	Quality of care
Morbidity rates based on how many hours doctors are working + their workloads (e.g. people more likely to have bad outcomes on the weekends)	Red	Quality of care
Doctors profile, name, picture should be public so that the patients can choose, as some are very good and some are terrible	Red	Quality of care
Outcomes of care in each area	Red	Quality of care
Quality/safety accountability and implication for the future	Red	Quality of care
GPs service quality	Red	Quality of care
Small town GP service seem be not observed and have a good quality service	Red	Quality of care
All info provided to be user friendly to encourage feedback from public	Red	People-centred
Doctors/Consultants need to give all patients adequate time	Red	People-centred
Doctors sometimes use "terms" or "medical terms" that many people don't understand	Red	People-centred
Waiting time for specialist (e.g. heart disease)	Red	People-centred
Don't know where I can complaint. Where I raise my voice	Red	People-centred
Access to e-book online if I belong to that primary care	Red	People-centred
User friendly info	Red	People-centred
Translators available for foreigns that don't speak english	Red	People-centred
Is there a way for patients to reliable research their own illness online	Red	People-centred
Education on how the person can take good selfcare and reduce time spent in clinics, hospitals	Red	People-centred
Timely access to GPs/consultants/NRI/xrays at an affordable cost	Red	People-centred
Great difficulty to get timely access to GPs. When you enter the system a person should ..time trajectories for all treatments	Red	People-centred
Same day GP appointments	Red	People-centred
The waiting in hospitals is ridiculous	Red	People-centred
Waiting times: detailed explanation	Red	People-centred
Time spent with the patient during examinations	Red	People-centred
Waiting for bed surgery shouldn't be a problem	Red	People-centred
Average waiting time broken out by A&E	Red	People-centred
Shorter waiting times for surgeries	Red	People-centred
Waiting for bed for surgery is the issue	Red	People-centred
I want to know how long it's going to take to wait for a procedure	Red	People-centred
It's important we know the average wait times for every service that can be accessed	Red	People-centred
People waiting too long for appointments	Red	People-centred
Waiting times for hospital care (A&E)	Red	People-centred
Follow up timeframe on average	Red	People-centred
Care for the elderly too long and waiting list for appointments and surgery	Red	People-centred
Long delays A&E (e.g. trolleys)	Red	People-centred
Average waiting times per specialised consultant	Red	People-centred
Prioritise the patient, not the problem	Red	People-centred
Average time of a consultation per specialisation	Red	People-centred
GPs waiting 3 weeks for results from a hospital is not good enough	Red	People-centred
Knonwing how long will you have to wait for a procedure	Red	People-centred
Alcoholism in Ireland versus other countries	Red	Health and well-being
Knowing the focus area of types of conditions or behaviors that are driving health issues	Red	Health and well-being
Average lenght of time people are sick before death (relating to life expectancy)	Red	Health and well-being
Obesity: how much physical activity and obesity education anyone receives	Red	Health and well-being
Acute coronary syndromes	Red	Health and well-being
Mental care: more info on places to go	Red	Health and well-being
Obesity: how much physical activity and obesity education anyone receives	Red	Health and well-being
Well being of people working in health care (EU vs Ireland)	Red	Health and well-being
Obesity	Red	Health and well-being
Well being of over 65 EU vs Ireland	Red	Health and well-being
I want to know more on research and cures for cancers	Red	Health and well-being
I would like information on mental health and well being	Red	Health and well-being
Mental health	Red	Health and well-being
Smoking	Red	Health and well-being
General health as we get older	Red	Health and well-being
Mental health care: what activity?	Red	Health and well-being
Is there a way to remove the gap between private and public health care	Red	Equity
How can countries with lower GDP offer free insurance and Ireland can't?	Red	Equity
I would like to be able to choose/not choose to have health insurance which is very expensive and gets more difficult as you age/retire	Red	Equity
Access to all services including GPs, consultants, medicines for everybody (i.e. timely access to all health services at na affordable cost)	Red	Equity
Medical inequality	Red	Equity
Equal access, based on urgency of condition, for all irrespective of income/age/gender	Red	Equity
All citizens treated equally	Red	Equity
No discrimination where you live	Red	Equity
Equality between counties, same services in all areas. A map graph	Red	Equity
Private or public healthcare system shouldn't matter, the treatment on offer should be the exact same	Red	Equity
Everyone should have access to healthcare regardless of income, age, gender, race, insurance/noninsurance	Red	Equity
Everyone gets the same time wait	Red	Equity
Average GP cost compared by country	Red	Equity
Huge concern cost (GPs)	Red	Equity
Afordability: many services in ireland are unaffordable and much too costly	Red	Equity
Compare services provided by private and public	Red	Equity
Treatment/prescription referrals by gender	Red	Equity
[rare diseases] Is there a way for the minorities to be heard (minorities being the unheard population with uncommon health issues)	Red	Equity
Being poor affects everything; waiting lists seeing doctor not good in poorer areas	Red	Equity
How can we assure that healthcare to all is equal regardless of money or any other criteria	Red	Equity
Cost of procedure in different countries (e.g. toothe extraction)	Red	Efficiency
Clear picture as to total health cost per year, breakdown per providers/services	Red	Efficiency
Averagre cost of prescription by country	Red	Efficiency
Local clinics and doctors could do more to stop people going into hospital or have more nurses who could do some of the work	Red	Efficiency
More consultation between doctor and patient on treatment	Red	Efficiency
Doctors are very busy and often prioritise untreated patients over discharging patients that are already treated in beds	Red	Efficiency
Results of care given (i.e. effectiveness)	Red	Effectiveness
Same access of services in different counties	Red	Coverage
Medical care usages	Red	Coverage
I don't think there's enought information on how to get access to care	Red	Coverage
How many primary care centres in Ireland and where are they located and what services do they provide?	Red	Coverage
knowledge of primary care centres	Red	Coverage
We need more local services	Red	Coverage
Availability of exercise nutrition advice to the general public	Red	Coverage
Home care support availability per county	Red	Coverage
Breakdown of regional access to health services for all demographics	Red	Coverage
I would like to know information on services available	Red	Coverage
Ultrasound checks in early pregnancy	Red	Coverage
Doctors rarely make home visits (e.g. emergency situation, elderly patients)	Red	Coverage
Social care disability and quality of life	Red	Coverage
There is not enough care packages for people who need care at home	Red	Coverage
Informing locally where new health services are introduced	Red	Coverage
Number of screening available	Red	Coverage
Number of specialists per practice area available in Ireland	Red	Coverage
No joined up thinking among professionals; patients have to have assertiveness to follow up	Red	Coordination of care
Future intentions (GDPR)	Red	Coordination of care
Communication between GPs+hospitals in term of patient history	Red	Coordination of care
Less responsability on patients to follow up with GPs on response from hospital	Red	Coordination of care
People in wrong system (e.g. home care, nursing home)	Red	Coordination of care
Primary centres need to link in better	Red	Coordination of care
Communication between all aspects of care	Red	Coordination of care
Quick information between all services	Red	Coordination of care
Good follow up care after you exit the hospital	Red	Coordination of care
Coordination between GP and hospital passing information	Red	Coordination of care
Are hospitals consulting with GP after surgery?	Red	Coordination of care
Too long in hospital; need more homecare	Red	Coordination of care
Transparency for all to know why and when you will be treated	Red	Coordination of care
Address appropriate discharge arrangements	Red	Coordination of care
Communication between GPS and specialists essential for patient confidence	Red	Coordination of care
More connection between doctors-pharmacy and other professions without pushing the patient around	Red	Coordination of care
Holistic approach to health, not just the symptoms the patient presents	Red	Coordination of care
Constant monitoring of medication by GPs	Red	Continuity of care
Silos in the system (e.g. visit GP again to get repeat prescription)	Red	Continuity of care
Better option on renewal of repeat prescriptions	Red	Continuity of care
Integrated primary care centre with access to many services including dentist, pharmacist, social worker...	Red	Continuity of care
Managing patients expectations is very important with plausible explanations to be given if outside expected timeframe	Red	Accessibility
Lower cut off drug scheme	Red	Accessibility
What is the difference in waiting time between private insurance holders and those without?	Red	Accessibility
Number who pass away waiting for treatment	Red	Accessibility
Ambulance emergency response times	Red	Accessibility
Access to all services regardless of the location of your residence	Red	Accessibility
Bed availability per hospital/per area	Red	Accessibility
Greater access and speedier in proportion to level of urgency of medical condition	Red	Accessibility
Social care for elderly	Yellow	Social and financial risk protection
Cost of the same medicine in different countries in comparison to Ireland	Yellow	Social and financial risk protection
Average use of GP visits for free compared to when they need to pay (children)	Yellow	Social and financial risk protection
That all patients get suitable treatment with delay and at an affordable rate	Yellow	Social and financial risk protection
Are services affordable for the average person?	Yellow	Social and financial risk protection
Why do doctors/consultants ask for payment prior to consultation?	Yellow	Social and financial risk protection
Number of people who are long-term hospital patients as a result of no discharge responsability	Yellow	Safety
Nosocomial infections in hospital	Yellow	Safety
Number of hospital and GP inspections occur and report on those findings	Yellow	Safety
GP doctor gave me too strong medicine as she too rush. I did told her	Yellow	Safety
Mutual respect between patient and health care professionals	Yellow	Responsiveness
All nurses and doctors need to train about ethical carreer. Certainly I experienced with both some are so good, some are so rude and rush	Yellow	Responsiveness
Citizens should be informed how many primary care centres (locally) perform so they can choose based on their evaluation	Yellow	Responsiveness
call out issues/errors without cause of backlash against individuals (unless appropriate)	Yellow	Responsiveness
CIPC need to offer more than just 8-12 councelling sessions	Yellow	Responsiveness
Hospital doctors don't speak in a language I understand, too many doctor terms. Patients don't "get it"	Yellow	Responsiveness
GP really needs to listen to patients.	Yellow	Responsiveness
Number of people who are in the system with preventable illnesses	Yellow	Quality of care
Consultant service quality	Yellow	Quality of care
People centred works per condition rather than view of all health	Yellow	People-centred
Too many people kept in hospital for no reason	Yellow	People-centred
Waiting times for different standard surgeries	Yellow	People-centred
Waiting times for consultations	Yellow	People-centred
Knowing you are one of 20 appointments at same time, so once there you have to wait for 3 hours	Yellow	People-centred
Waiting times in A&E and for specific procedures	Yellow	People-centred
More information on waiting times for all services	Yellow	People-centred
A&E waiting time (triage focus needed)	Yellow	People-centred
Waiting 15 minutes to get called [by GP] and the doctor spent 1.5 minutes to consult and check my sickness	Yellow	People-centred
List of GP in community more easily avalable	Yellow	People-centred
Waiting times for service	Yellow	People-centred
Waiting time in children's hospitals for basic check (e.g. child with high fever)	Yellow	People-centred
Hospital doctors don't involve patients in their own treatment plans	Yellow	People-centred
Patients should be given all details of the purposes of available treatments and being able to chose their preferred ones	Yellow	People-centred
Provide quality advices (no rush)	Yellow	People-centred
mental health statistics regarding whic illness are most prevalent	Yellow	Health and well-being
Alcohol abuse	Yellow	Health and well-being
More information on quiting smoking and where to get help	Yellow	Health and well-being
Smoking	Yellow	Health and well-being
Mental health needs to be higher in list	Yellow	Health and well-being
Important to know how long people are living health screening	Yellow	Health and well-being
The waiting times between private and public health system is immoral	Yellow	Equity
A €60/GP visit is too expensive for basic income if they don't have medical care. My husband was nearly die because he hates to pay this cost	Yellow	Equity
Fairness	Yellow	Equity
Use of generic medicines	Yellow	Efficiency
As time goes on is there a way to which implement the latest technologies and treatments to ensure the quality of care is always as high as possible	Yellow	Effectiveness
Readmissions	Yellow	Effectiveness
Number relating to how often people are resubmitted to the system in short-term	Yellow	Effectiveness
Coverage	Yellow	Coverage
The percentage of private insurance holders using public services	Yellow	Coverage
Vaccine take ups	Yellow	Coverage
GP/Specialists available per county	Yellow	Coverage
More information on where primary care services are located	Yellow	Coverage
Access to health care for asylum seekers	Yellow	Coverage
More local (private) options needed	Yellow	Coverage
Access locally	Yellow	Coverage
How can we improve access of service for people in rural Ireland?	Yellow	Coverage
GP to patient ratio per county/province	Yellow	Coverage
The system is too complicated there is always way too many steps to get to the care you need	Yellow	Coordination of care
Where the inefficiencies or places for improvement lie in our health systems	Yellow	Coordination of care
If referred by GP, the info does come back to the GP	Yellow	Coordination of care
How can we update our systems and links between healthcare providers and how can we continue to do this in the future?	Yellow	Coordination of care
Seems that coordination of care is done by individual, not the system	Yellow	Coordination of care
No breaks in the information system	Yellow	Coordination of care
Follow up information after surgery	Yellow	Coordination of care
Continuity of information between health providers	Yellow	Coordination of care
Hospitals can take 2-3 weeks to pass information back to the GPs	Yellow	Coordination of care
Changes to treatment need to be informed by GP	Yellow	Coordination of care
More follow up from doctor	Yellow	Coordination of care
Follow up call/update on how you are daily (30 days? 60 days?)	Yellow	Coordination of care
GPs provide more services like x-ray to relieve A&E somewhat	Yellow	Coordination of care
Not sure all GPs offer alternative option (mindfulness, no antibiotics)	Yellow	Coordination of care
Doctor keep changing at GP and don't understand much about a patient and are always in a rush (bad quality service)	Yellow	Continuity of care
Free repeat prescription	Yellow	Continuity of care
Open data needed (opt in/opt out)	Yellow	Accessibility
People travelling from far distances	Yellow	Accessibility
Expectation is to wait less than 20 minutes and see Dr's calendar and book online	Yellow	Accessibility
Would it be possible to wait in a virtual cue online instead at spending hours in A&E	Yellow	Accessibility
I would like to see the average wait times for getting under the care of a consultant or specialist	Yellow	Accessibility
Comparison between public and private waiting times	Yellow	Accessibility
